# Supplementary material for: Infection with genotoxin‐producing Salmonella enterica synergises with loss of the tumour suppressor APC in promoting genomic instability via the PI3K pathway in colonic epithelial cells
Source: PubMed Central journal article supplement (PMC6899655; doi:10.1111/cmi.13099), 2019-08-26

Figure S1

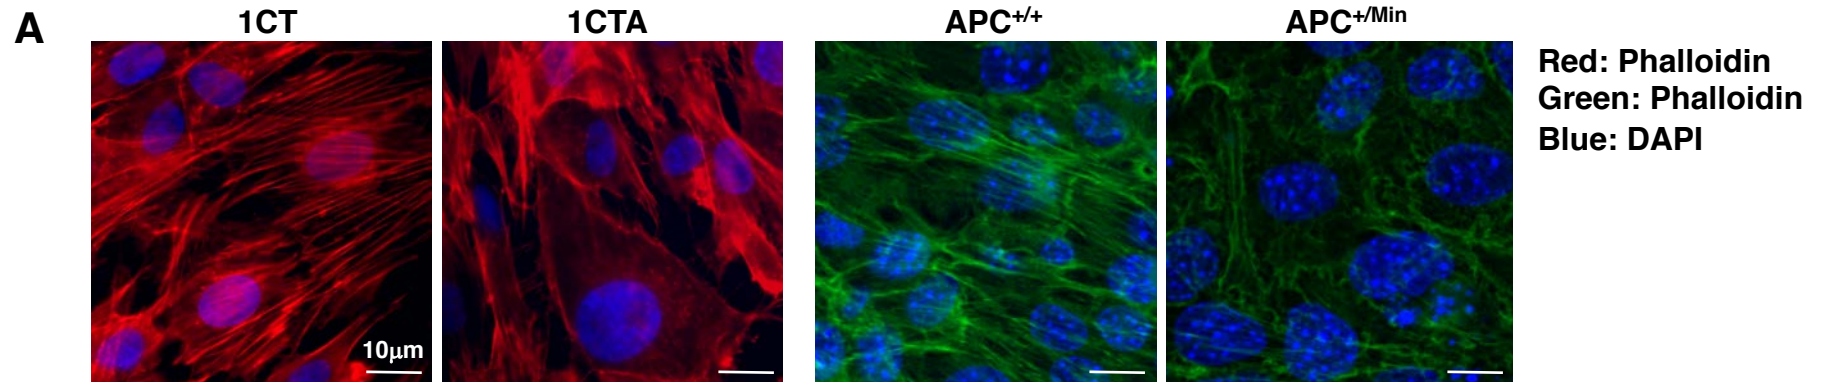

**B**

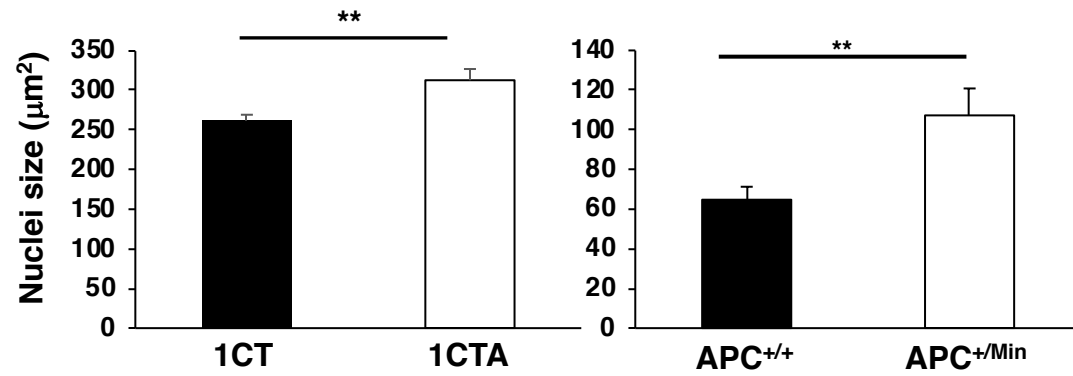

Figure S2

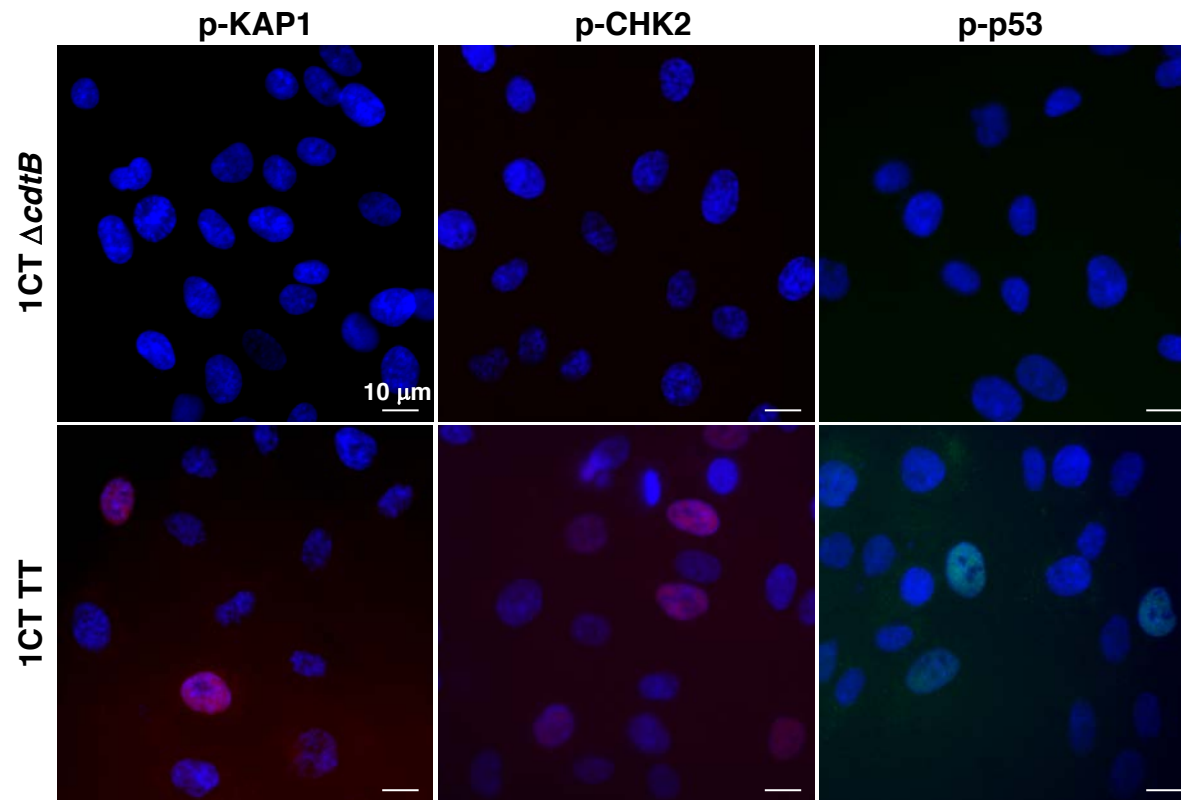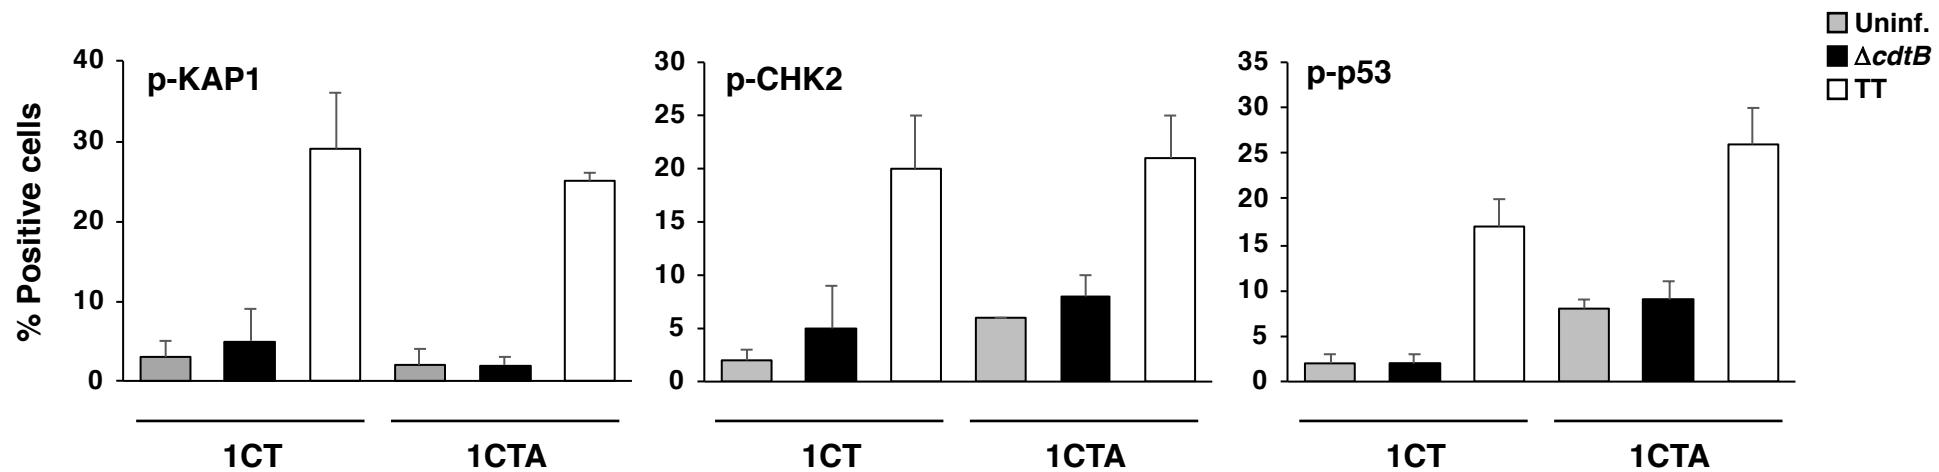

Figure S3

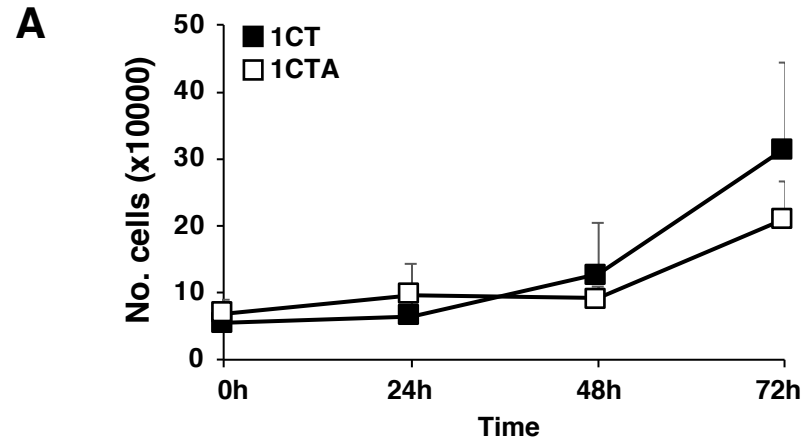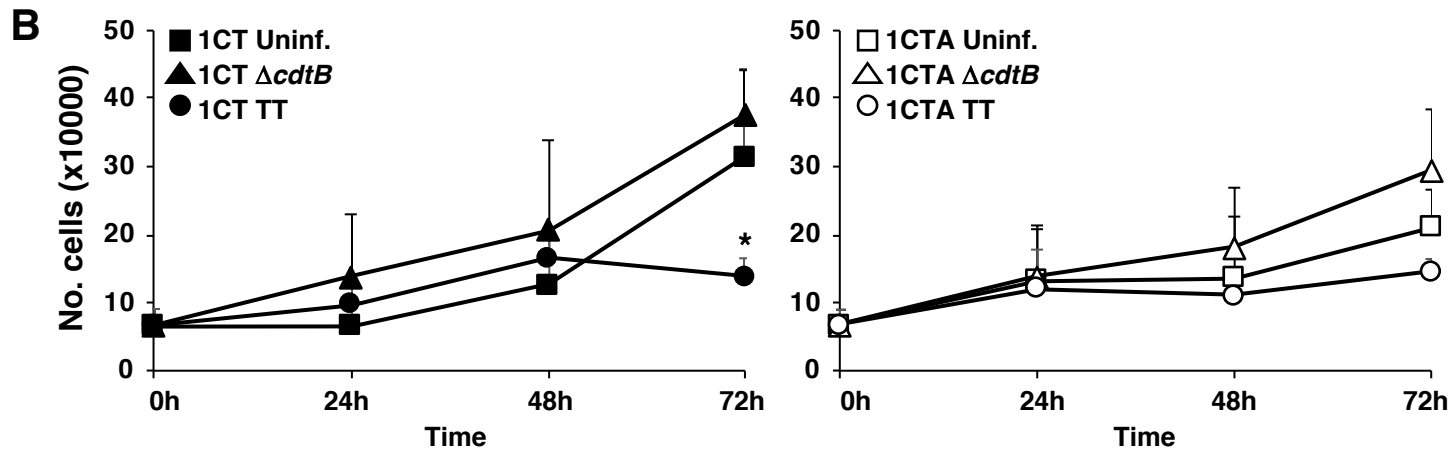

**Figure S4**

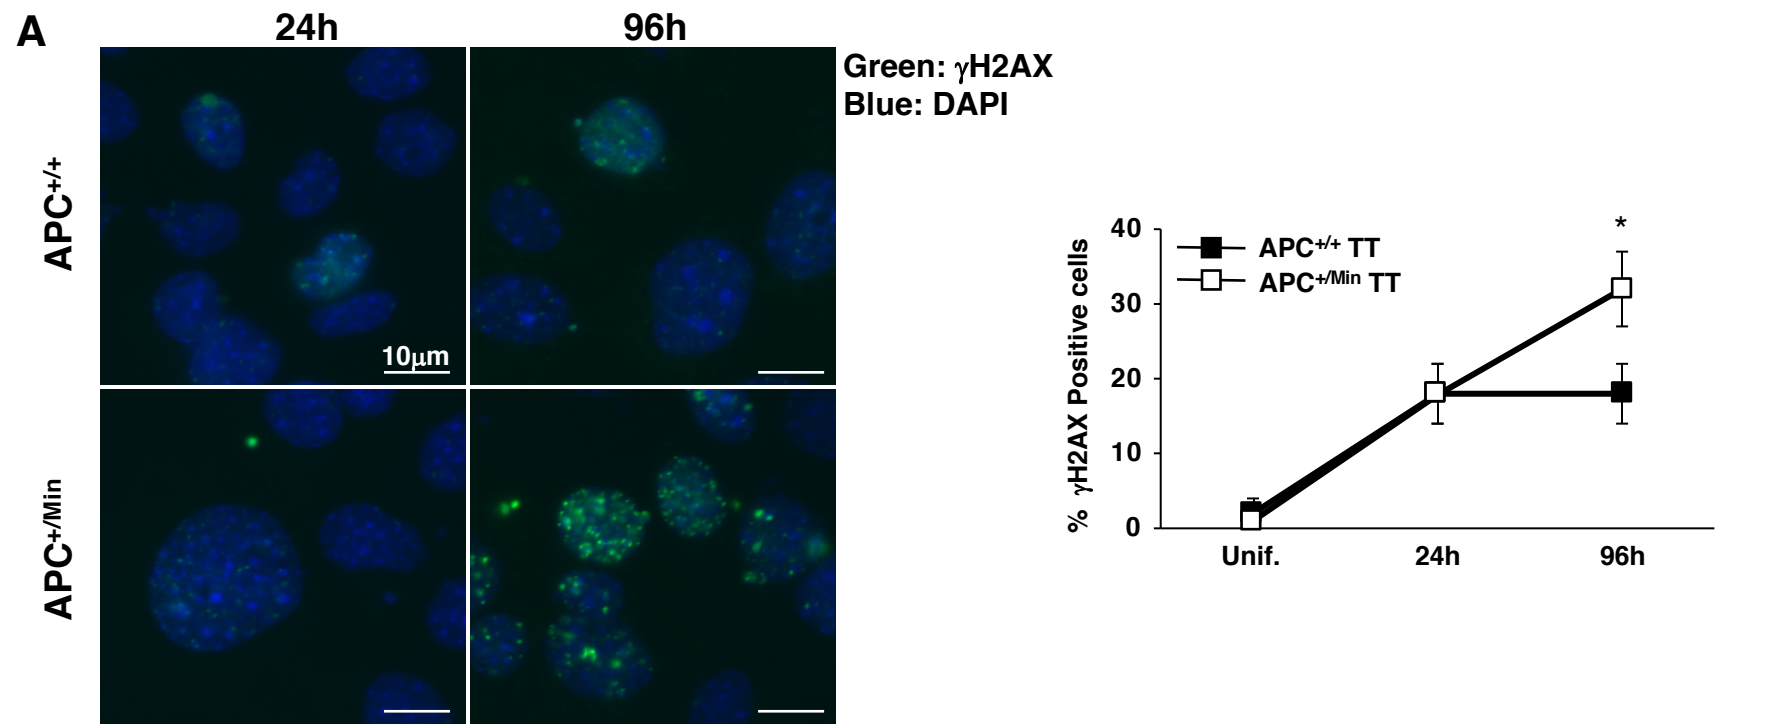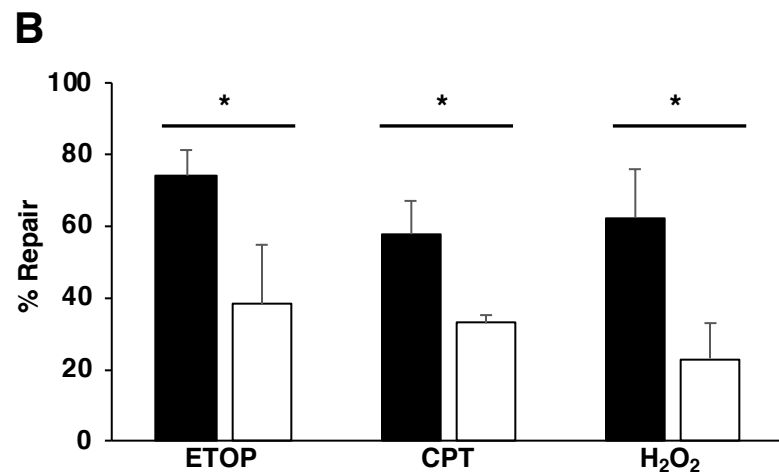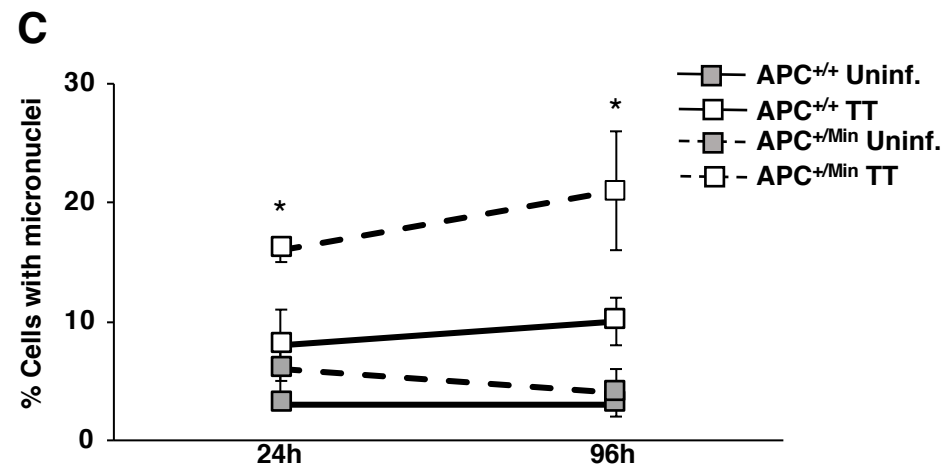

Figure S5

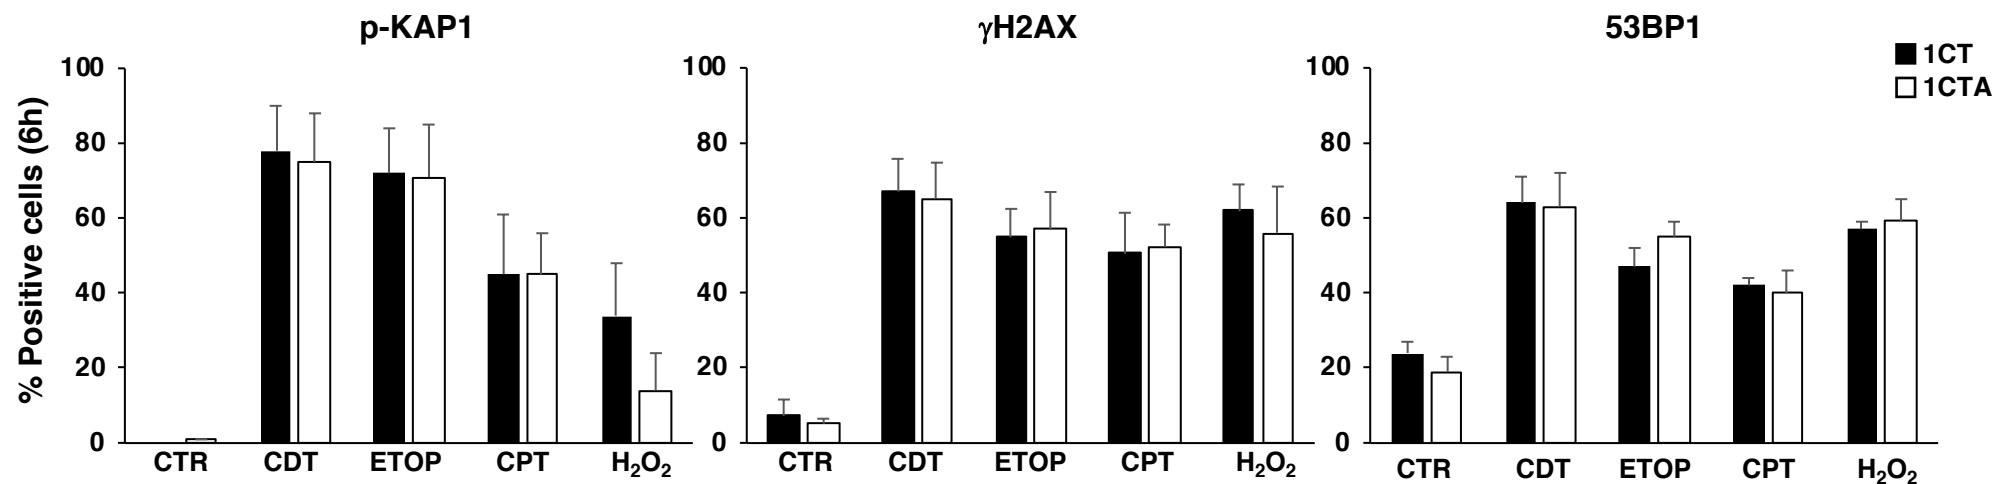

**Figure S6**

**A**

**1CTA CDT DMSO**

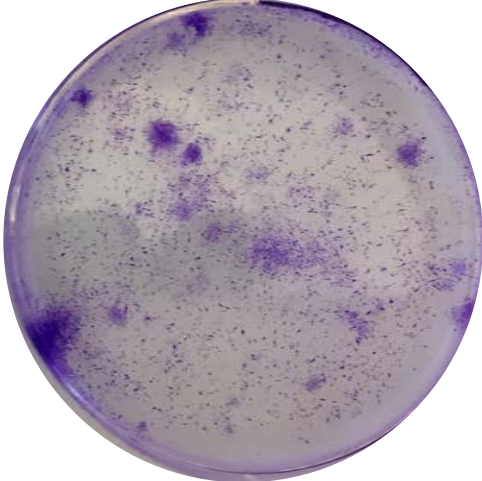

**1CTA CDT GDC-0941**

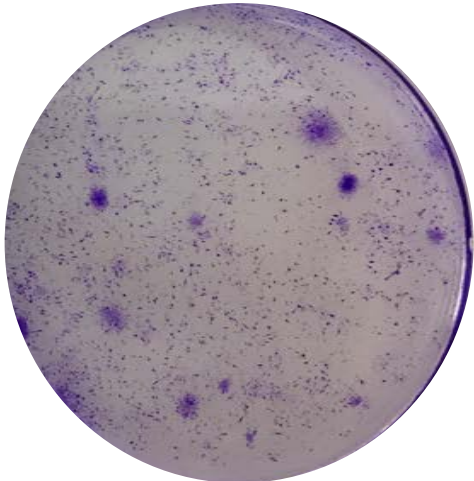

**B**

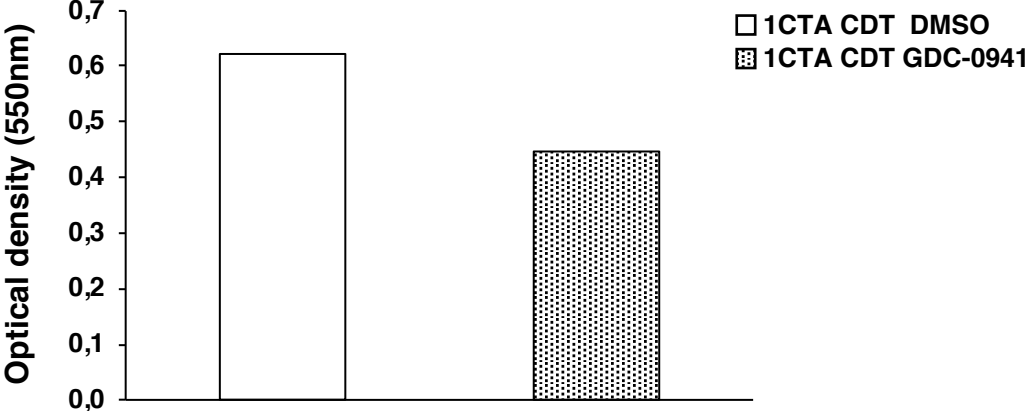

**Figure S7**

**A**

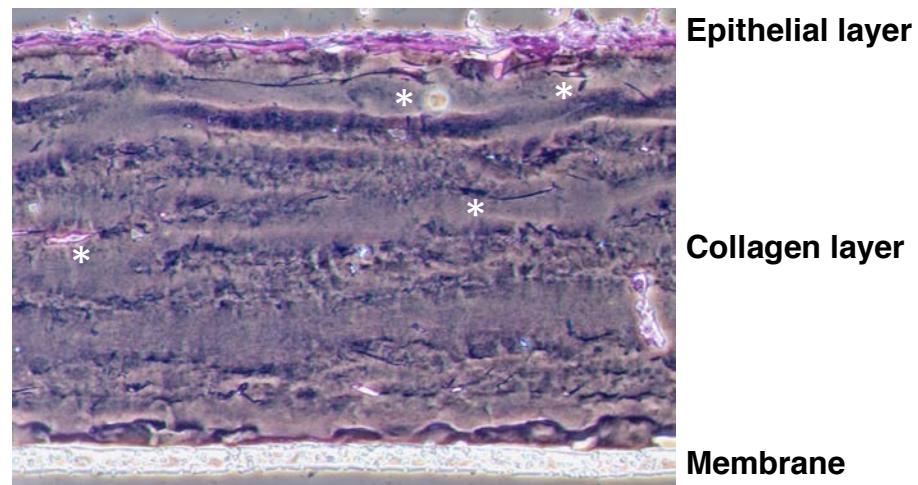

**B**

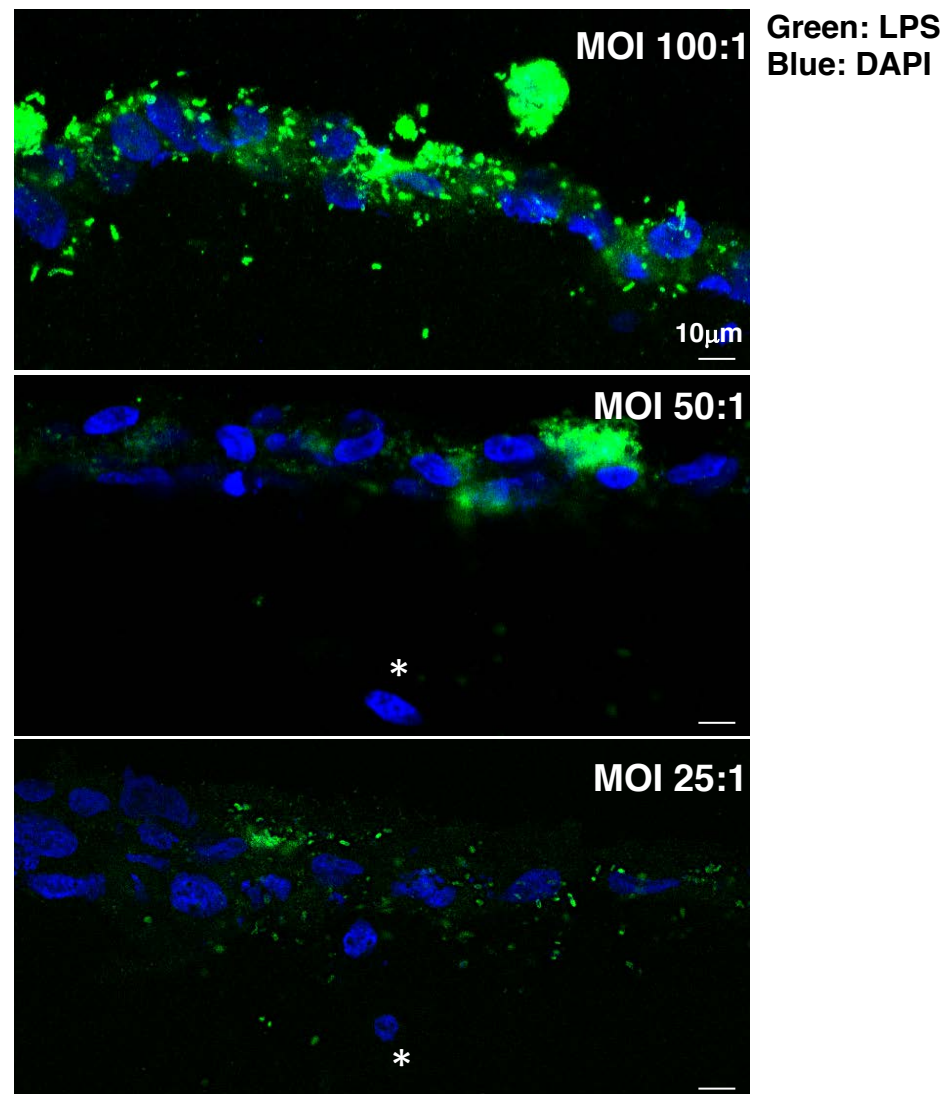

**C**

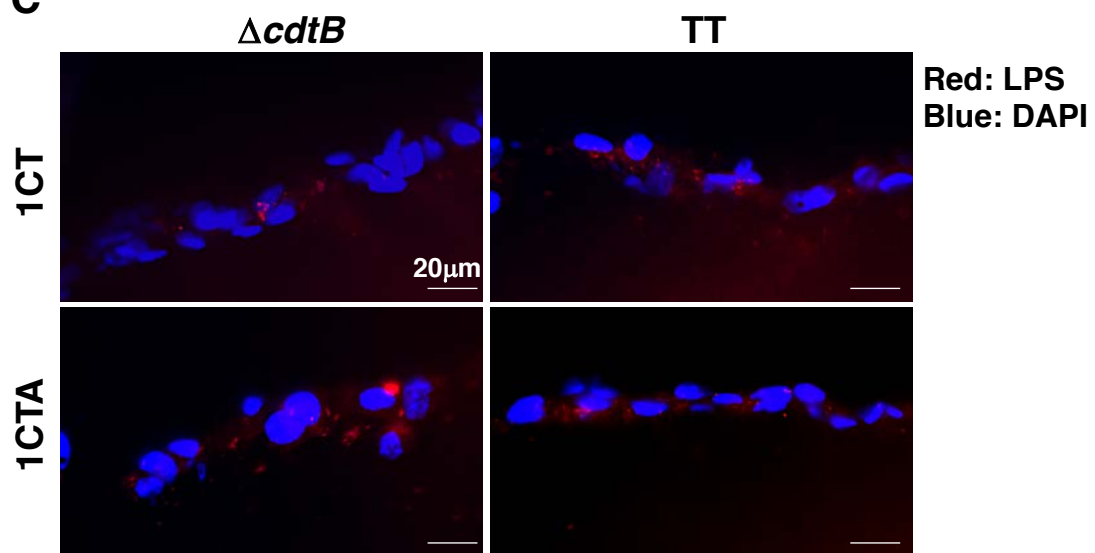

Supplement: CMI-21-na-s001.pdf [file CMI-21-na-s001.pdf]
